# Supplementary material for: Smart textiles in wound care: functionalization of cotton/PET blends with antimicrobial nanocapsules
Source: Royal Society of Chemistry journal article supplement (doi:10.1039/c9tb01474h), 2019-01-01
Supplement: c9tb01474h1.pdf [file c9tb01474h1.pdf]

## Supporting Information

# Smart Textiles in Wound Care: Functionalization of Cotton/PET Blends with Antimicrobial Nanoparticles

*Felice Quartinello*<sup>a,\*</sup>, *Claudia Tallian*<sup>a,\*</sup>, *Julia Auer*<sup>a</sup>, *Herta Schön*<sup>a</sup>, *Robert Vielnascher*<sup>a,b</sup>, *Simone Weinberger*<sup>a</sup>, *Karin Wieland*<sup>c</sup>, *Anna M. Weihs*<sup>d,e</sup>, *Alexandra Herrero-Rollett*<sup>a</sup>, *Bernhard Lendl*<sup>c</sup>, *Andreas H. Teuschl*<sup>d,e</sup>, *Alessandro Pellis*<sup>a,f,+</sup> and *Georg M. Guebitz*<sup>a,b</sup>

- a. University of Natural Resources and Life Sciences, Vienna (BOKU), Institute for Environmental Biotechnology, Department for Agrobiotechnology (IFA-Tulln), Konrad-Lorenz-Strasse 20, 3430 Tulln an der Donau, Austria.
- b. Austrian Centre of Industrial Biotechnology, Konrad-Lorenz-Strasse 20, 3430 Tulln an der Donau, Austria.
- c. Institute of Chemical Technologies and Analytics, Division Environmental Process, Analytics and Sensors, TU Wien, Getreidemarkt 9/164 AC, 1060 Vienna, Austria.
- d. Department of Biochemical Engineering, University of Applied Sciences Technikum Wien, 1200 Vienna, Austria.
- e. Austrian Cluster for Tissue Regeneration, Vienna, Austria
- f. Department of Chemistry, University of York, Heslington, York, YO10 5DD, United Kingdom

\*Equally contributed to the work

+ Corresponding Author: [alessandro.pellis@boku.ac.at](mailto:alessandro.pellis@boku.ac.at), [alessandro.pellis@gmail.com](mailto:alessandro.pellis@gmail.com)

Number of pages in the supporting information: 5

Number of figures in the supporting information: 3

Number of tables in the supporting information: 3

**Table S1.** HPLC gradient for determination of glucose, where A is water, B is methanol and C is formic acid.

| <b>Time [min]</b> | <b>A [%]</b> | <b>B [%]</b> | <b>C [%]</b> | <b>Flow (mL min<sup>-1</sup>)</b> | <b>Pressure (bar)</b> |
|-------------------|--------------|--------------|--------------|-----------------------------------|-----------------------|
| 1                 | 80           | 10           | 10           | 0.75                              | 600                   |
| 8                 | 40           | 50           | 10           | 0.75                              | 600                   |
| 10                | 0            | 90           | 10           | 0.75                              | 600                   |
| 15                | 0            | 90           | 10           | 0.75                              | 600                   |

**Table S2.** Ratio of HSA to SF in nanoparticle formulations with two different degradation degrees of SF (30 and 60 mb) before sonication, edited from Tallian et al.<sup>30</sup>

| <b>ID<sup>1</sup></b> | <b>Degradation degree of SF<sup>2</sup> [mb]</b> | <b>% SF</b> |
|-----------------------|--------------------------------------------------|-------------|
| <b>HSA</b>            | <b>none</b>                                      | <b>0</b>    |
| <b>3010</b>           | <b>30</b>                                        | <b>10</b>   |
| <b>3025</b>           | <b>30</b>                                        | <b>25</b>   |
| <b>3050</b>           | <b>30</b>                                        | <b>50</b>   |
| <b>3075</b>           | <b>30</b>                                        | <b>75</b>   |
| <b>6010</b>           | <b>60</b>                                        | <b>10</b>   |
| <b>6025</b>           | <b>60</b>                                        | <b>25</b>   |
| <b>6050</b>           | <b>60</b>                                        | <b>50</b>   |
| <b>6075</b>           | <b>60</b>                                        | <b>75</b>   |

<sup>1</sup> ID composed of the combination of the degradation degree and the % of silk fibroin in the formulation e.g. 3050 with 30 mb SF and 50% HSA/SF ratio, HSA refers to formulations containing no silk fibroin

<sup>2</sup> Refers to the minutes of boiling (30 minutes or 60 minutes)

**A**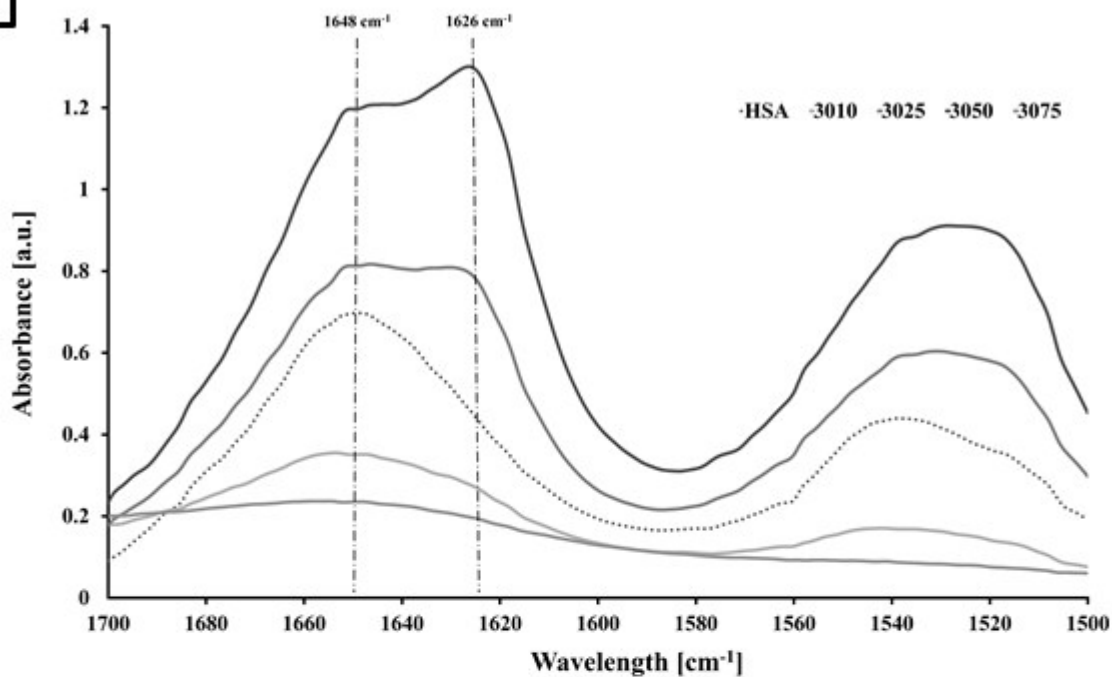**B**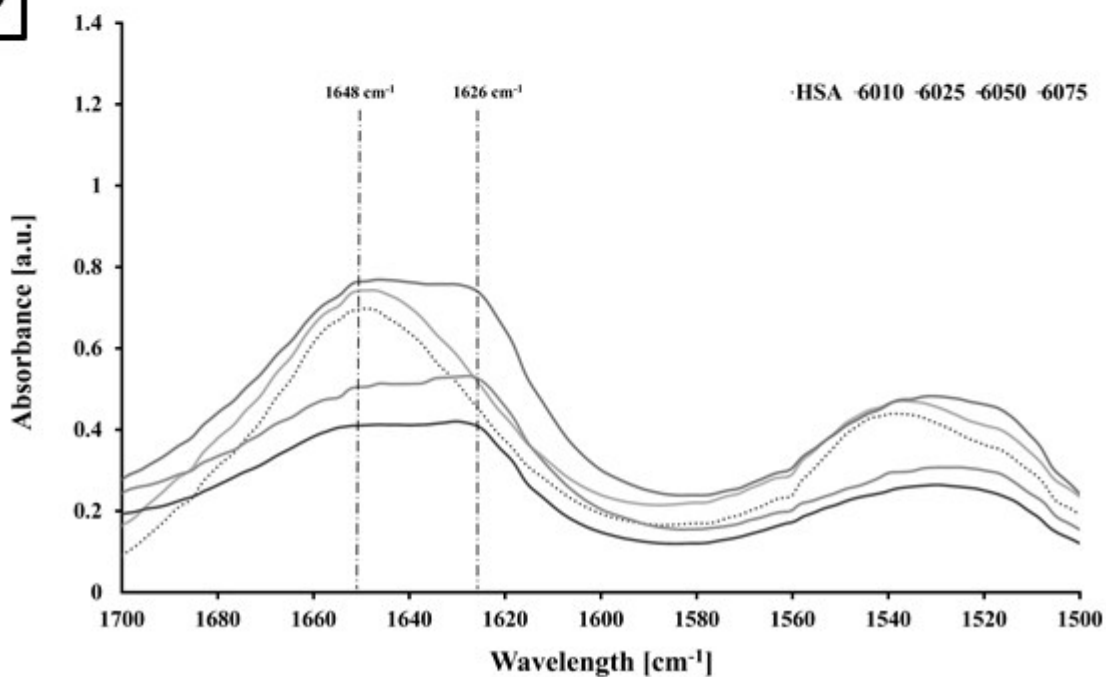

**Figure S1:** ATR-FTIR spectra of the amide I region ( $\beta$ : 1626 cm<sup>-1</sup>;  $\alpha$ : 1648 cm<sup>-1</sup>) of eugenol loaded HSA and HSA/SF nanocapsules normalized between 650 and 1200 cm<sup>-1</sup> and baseline corrected<sup>36</sup>.

**Table S3.** Dynamic light scattering based hydrodynamic radius data in nm over time for a measurement period of 30 min of eugenol loaded HSA/SF nanocapsules consisting of two different degradation degrees of SF (30 or 60 mb) and different concentrations of SF (10-75%) evaluated for the initial 10 min (t1), the measurement time between 10-30 min (monodisperse phase, t2) and the complete measurement time (t3).

|             | <b>t<sub>1</sub></b> |          | <b>t<sub>2</sub></b> |          | <b>t<sub>3</sub></b> |          |
|-------------|----------------------|----------|----------------------|----------|----------------------|----------|
|             | $\bar{x}$            | $\sigma$ | $\bar{x}$            | $\sigma$ | $\bar{x}$            | $\sigma$ |
|             | <b>[nm]</b>          |          |                      |          |                      |          |
| <b>HSA</b>  | 328.78               | 46.79    | 400.92               | 65.86    | 438.62               | 108.70   |
| <b>3010</b> | 1120.71              | 44.15    | 574.00               | 92.76    | 796.63               | 5.60     |
| <b>3025</b> | 677.67               | 65.56    | 347.75               | 40.95    | 448.71               | 23.15    |
| <b>3050</b> | 762.92               | 39.05    | 369.97               | 3.64     | 499.01               | 28.69    |
| <b>3075</b> | 378.85               | 14.34    | 319.73               | 17.50    | 345.03               | 17.95    |
| <b>6010</b> | 1277.90              | 156.18   | 504.41               | 35.91    | 845.10               | 201.19   |
| <b>6025</b> | 655.15               | 78.53    | 403.11               | 50.36    | 447.87               | 85.24    |
| <b>6050</b> | 477.74               | 4.29     | 303.77               | 0.75     | 341.51               | 31.73    |
| <b>6075</b> | 401.87               | 25.95    | 350.76               | 28.81    | 365.16               | 35.18    |

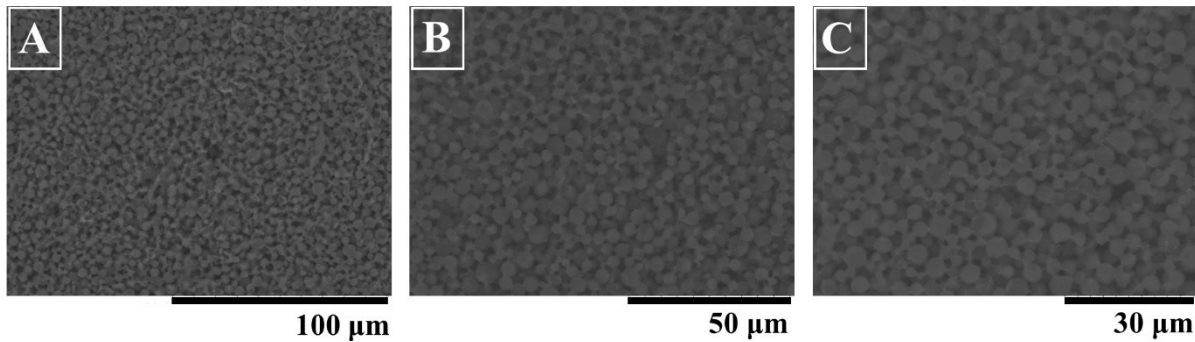

**Figure S2:** Scanning electron microscope images of eugenol loaded HSA/SF nanocapsules consisting of 25% SF with lower degradation degree of 30 mb (3025) with (A) 1000x (B) 1500x (C) 2000x magnifications obtained with a SEM equipped with a cryo chamber at -20 °C.

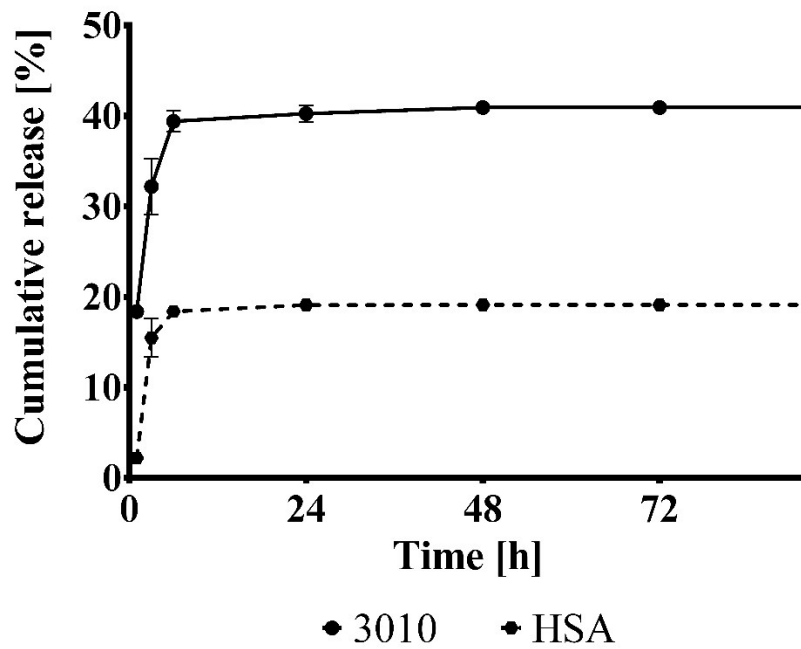

**Figure S3.** Cumulative release of eugenol from HSA and HSA/SF nanocapsules with lower degradation degree (30 mb) and 10 SF over a time period of 168 h in artificial salivas prepared as described in the paper of Callewaert *et al.*<sup>29</sup> (EN pH 6.0).

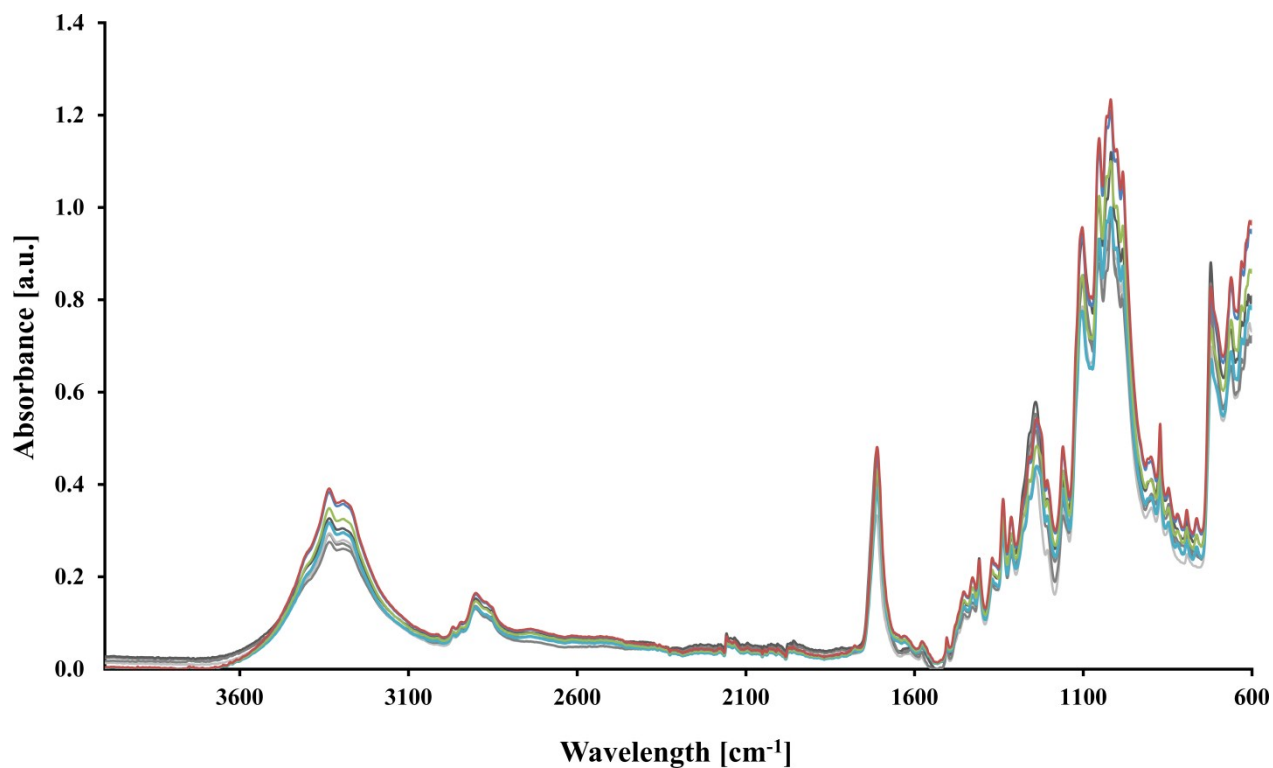

**Figure S4.** FTIR spectroscopy of cotton/polyester blend with immobilized HSA/SF nanocapsules. Reaction I (black line); Reaction II (grey line); Reaction III (dark grey dash line); Reaction IV (dark grey dash line); Reaction V (cyano dash line); Reaction VI (green line); Reaction VII (blue line); Reaction VIII (red line). Spectra were baseline corrected and normalized in the range of 2500-2000 cm<sup>-1</sup>.<sup>34</sup>

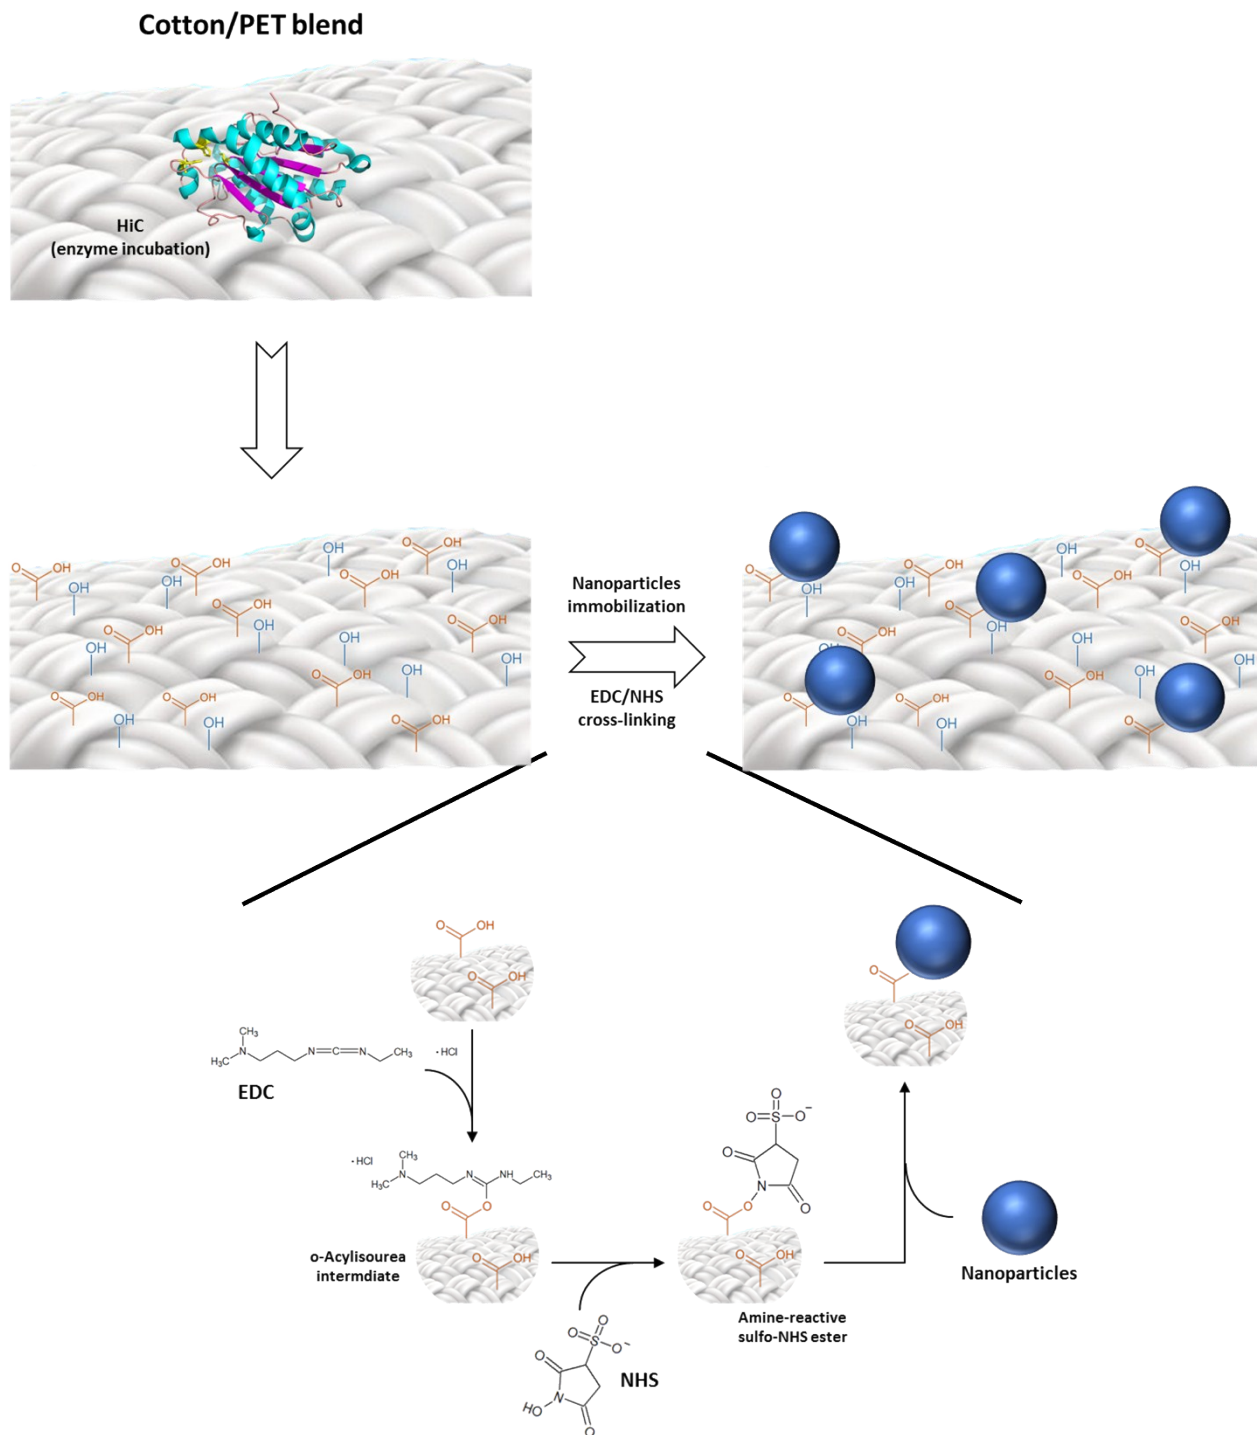

**Figure S5.** Reaction scheme of the proposed coupling.

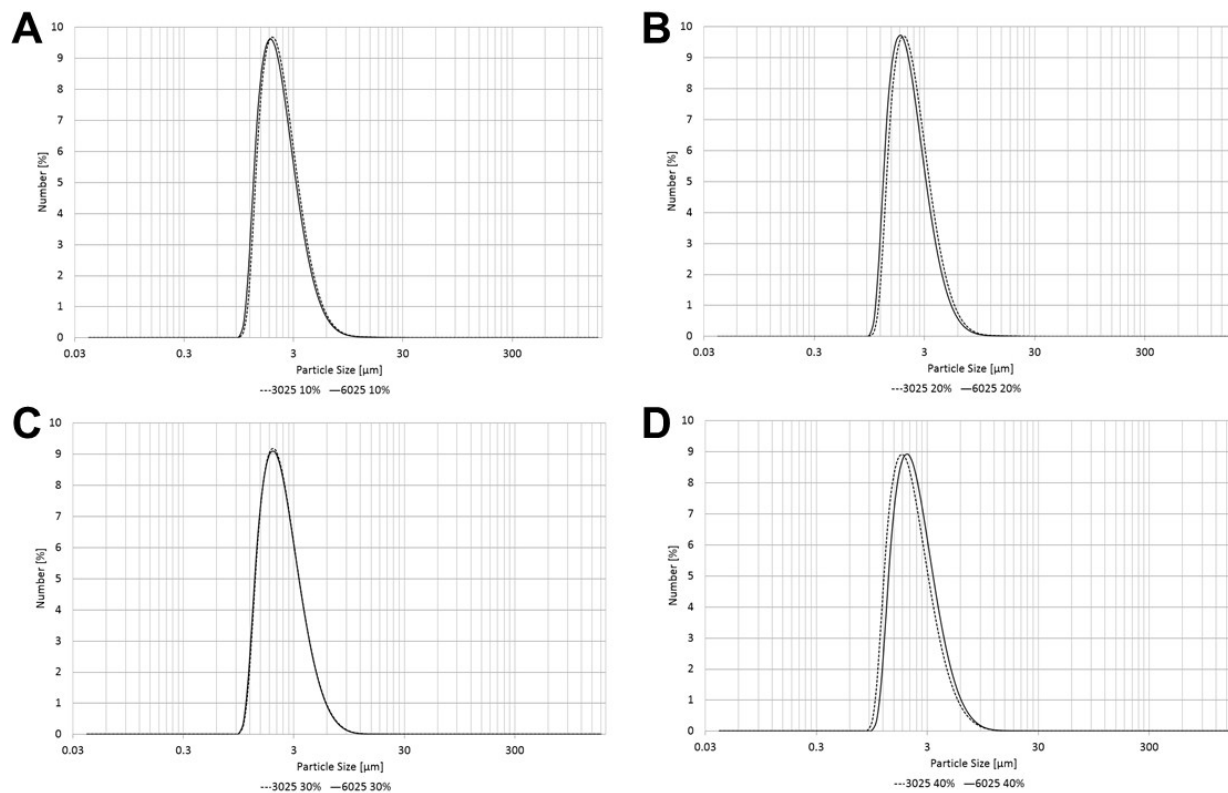

**Figure S6.** Comparison of particle size obtained using a laser diffraction-based particle analyser (Beckman Coulter, Inc. LS13320, US) of sonochemically produced HSA/SF nanocapsules consisting of 25% silk fibroin with high (6025) and low (3025) degradation degree using different amplitude settings of (A) 10%, (B) 20%, (C) 30% and (D) 40%. No significant affect of changed amplitude settings on particle size were determined.
